# Supplementary material
Source: publisher site journal article supplement (https://www.dovepress.com/article/383010)
Supplement: Supplementary file 1 [file get_supplementary_file.php]

**Table S1.** The primer sequences of selected genes

aF: forward primer, R: reverse primer.

| **Primera** | **Sequence (5，-3，)** | **Length(bp)** | **Primera** | **Sequence (5，-3，)** | **Length(bp)** |
| --- | --- | --- | --- | --- | --- |
| *blaKPC-F*  *blaKPC-R* | CGTCTAGTTCTGCTGTCTTG  CTTGTCATCCTTGTTAGGCG | *798* | *aerobactin-F*  *aerobactin-R* | GCATAGGCGGATACGAACAT  CACAGGGCAATTGCTTACCT | 556 |
| *blaOXA-48-F*  *blaOXA-48-R* | GCGTGGTTAAGGATGAACAC  CATCAAGTTCAACCCAACCG | *438* | *iucA-F*  *iucA-F* | AATCAATGGCTATTCCCGCTG  CGCTTCACTTCTTTCACTGACAGG | 239 |
| *blaNDM-F*  *blaNDM-R* | GGTTTGGCGATCTGGTTTTC  CGGAATGGCTCATCACGATC | *621* | *kfuB-F*  *kfuB-R* | GAAGTGACGCTGTTTCTGGC  TTTCGTGTGGCCAGTGACTC | 962 |
| *blaIMP-F*  *blaIMP-R* | GGAATAGAGTGGCTTAAYTCTC  GGTTTAAYAAAACAACCACC | *232* | *alls-F*  *alls-R* | CCGAAACATTACGCACCTTT  ATCACGAAGAGCCAGGTCAC | 508 |
| *blaVIM-F*  *blaVIM-R* | ATGTTAAAAGTTATTAGTAGT  CTACTCGGCGACTGAGCGAT | *801* | *ybtA-F*  *ybtA-R* | CACCGCAAACGCAATCTG  GCCATAGACGCTGTTGTTGA | 782 |
| *blaGIM-F*  *blaGIM-R* | TCGACACACCTTGGTCTGAA  AACTTCCAACTTTGCCATGC | *713* | *ureA-F*  *ureA-R* | GACAAGCTGTTGCTGTTTACC  CGGGTTGTGAACGGTGAC | 270 |
| *Ompk35-F*  *Ompk35-R* | ATGATGAAGCGCAATATTCTGGCAGTGG  TCGGCTTTGTCGCCATTGCCGTCA | *684* | *wabG-F*  *wabG-R* | ACCATCGGCCATTTGATAGA  CGGACTGGCAGATCCATATC | *683* |
| *Ompk36-F*  *Ompk36-R* | ATGAAAGTTAAAGTACTGTCCCTC  GTCGTCGGTAGAGATACCGGC | *1076* | *ycf-F*  *ycf-R* | ATCAGCAGTCGGGTCAGC  CTTCTCCAGCATTCAGCG | *160* |
| *K1-F*  *K1-R* | GGTGCTCTTTACATCATTGC  GCAATGGCCATTTGCGTTAG | *1283* | *entB-F*  *entB-R* | ATTTCCTCAACTTCTGGGGC  AGCATCGGTGGCGGTGGTCA | *371* |
| *K2-F*  *K2-R* | GACCCGATATTCATACTTGACAGAG  CCTGAAGTAAAATCGTAAATAGATGGC | *641* | *magA-F*  *magA-R* | GGTGCTCTTTACATCATTGC  GCAATGGCCATTTGCGTTAG | *1100* |
| *K5-F*  *K5-R* | TGGTAGTGATGCTCGCGA  CCTGAACCCACCCCAATC | *280* | *rmpA-F*  *rmpA-R* | ACTGGGCTACCTCTGCTTCA  CTTGCATGAGCCATCTTTCA | *516* |
| *K20-F*  *K20-R* | CGGTGCTACAGTGCATCATT  GTTATACGATGCTCAGTCGC | *741* | *uge-F*  *uge-R* | TCTTCACGCCTTCCTTCACT  GATCATCCGGTCTCCCTGTA | *534* |
| *K54-F*  *K54-R* | CATTAGCTCAGTGGTTGGCT  GCTTGACAAACACCATACAG | *881* | *Hcp-F*  *Hcp-R* | CCGACCGATAACAACACCG  GGGATTCACTTTCACCACCTT | *225* |
| *K57-F*  *K57-R* | CTCAGGGCTAGAAGTGTCAT  CACTAACCCAGAAAGTCGAG | *1037* | *iutA-F*  *iutA-R* | GGCTGGACATCATGGGAACTGG  CGTCGGGAACGGGTAGAATCG | *300* |
| *fimH-F*  *fimH-R* | TGCTGCTGGGCTGGTCGATG  CGGAGGGTGACGGTGACATC | *909* | *iroB-F*  *iroB-R* | ATCTCATCATCTACCCTCCGCTC  GGTTCGCCGTCGTTTTCAA | *235* |
| *wcaG-F*  *wcaG-R* | GGTTGGKTCAGCAATCGTA  ACTATTCCGCCAACTTTTGC | *469* | *peg-344-F*  *peg-344-R* | CTTGAAACTATCCCTCCAGTC  CCAGCGAAAGAATAACCCC | *508* |
| *rmpA2-F* | GTGCAATAAGGATGTTACATTA | *430* | *rmpA2-R* | GGATGCCCTCCTCCTG | *430* |

**Table S2.** Univariate analysis for prognosis in CRKP-infected patients

|  | **Poor prognosis** | |  |  |
| --- | --- | --- | --- | --- |
| **YES** | **NO** | ***P* a** | **χ2** |
| **Gender** |  |  |  |  |
| male  female | 33 | 13 | 0.044* | 4.062 |
| 7 | 9 |  |  |
| **ICU admission** |  |  |  |  |
| YES  NO | 32 | 9 | 0.002* | 9.683 |
| 8 | 13 |  |  |
| **Basic disease** |  |  |  |  |
| Hypertension  Diabetes  Kidney disease  Tumour  Pulmonary disease | 18 | 14 | 0.160 | 1.974 |
| 8 | 6 | 0.512 | 0.429 |
| 10 | 9 | 0.194 | 1.690 |
| 9 | 1 | 0.066 | 3.382 |
| 29 | 8 | 0.006* | 7.702 |
| **Invasive operation** |  |  |  |  |
| Urinary catheter  Tracheal intubation  Venous atheterization | 13 | 5 | 0.417 | 0.658 |
| 23 | 8 | 0.111 | 2.536 |
| 5 | 1 | 0.311 | 1.027 |
| **Carbapenems** |  |  |  |  |
| *bla*KPC  *bla*NDM | 36 | 14 | 0.012* | 6.320 |
| 5 | 3 | 0.898 | 0.016 |
| **protein deletion** |  |  |  |  |
| Ompk35  Ompk36 | 2 | 1 | 0.936 | 0.006 |
| 4 | 2 | 0.908 | 0.013 |

a*P value***:** calculated using the χ2 test

*：P<0.05
